# Supplementary material for: Cell Growth Inhibition Effect of DsiRNA Vectorised by Pectin-Coated Chitosan-Graphene Oxide Nanocomposites as Potential Therapy for Colon Cancer
Source: Hindawi journal article supplement (doi:10.1155/2017/4298218), 2017-05-25
Supplement: f1 [file 4298218.f1.docx]

**Supplementary 1** Particle size, PDI and zeta potential of pectin-enveloped CS-GO nanocomposites, n = 3

|  | **Before DsiRNA loading** | | | **After DsiRNA loading** | | | **After pectin coating** | | | | |
| --- | --- | --- | --- | --- | --- | --- | --- | --- | --- | --- | --- |
| **GO (wt%)** | **PS (nm) ± SD** | **PDI ± SD** | **ZP (mV) ± SD** | **PS (nm) ± SD** | **PDI ± SD** | **ZP (mV) ± SD** | **Pectin (%)** | **PS (nm) ± SD** | **PDI ± SD** | **ZP (mV) ± SD** | **%EE**  **± SD** |
| **0.25** | 308.2 ± 85.9 | 0.65 ± 0.14 | +17.0 ± 1.4 | 125.2 ± 15.6 | 0.45 ± 0.16 | +10.5 ± 1.4 | **0.1** | 554.5 ± 124.6 | 0.47 ± 0.19 | -10.7 ± 1.2 | 92.6 ± 3.9 |
| **0.2** | 584.6 ± 75.2 | 0.59 ± 0.15 | -12.6 ± 3.1 | 90.2 ±5.4 |
| **0.25** | 679.3 ± 106.7 | 0.46 ± 0.09 | -23.0 ± 5.5 | 99.0 ± 0.8 |
| **0.50** | 392.4 ± 84.5 | 0.58 ± 0.09 | +13.4 ± 2.580 | 194.9 ± 31.5 | 0.55 ± 0.14 | +18.9 ± 3.3 | **0.1** | 611.9 ± 128.2 | 0.68 ± 0.09 | -12.8 ± 5.0 | 86.6 ± 1.2 |
| **0.2** | 642.4 ± 48.4 | 0.78 ± 0.14 | -13.5 ± 0.8 | 97.0 ±1.5 |
| **0.25** | 633.6 ± 71.1 | 0.75 ± 0.14 | -19.0 ±1.2 | 96.8 ± 1.7 |
| **1.00** | 244.0 ± 103.2 | 0.58 ± 0.08 | +18.1 ± 2.2 | 163.3 ± 63.2 | 0.46 ± 0.15 | +13.0 ± 3.7 | **0.1** | 502.5 ± 53.5 | 0.70 ± 0.12 | -13.3 ± 2.5 | 99.0 ± 0.4 |
| **0.2** | 557.5 ± 200.5 | 0.69 ± 0.10 | -17.1 ± 3.7 | 99.6 ± 0.4 |
| **0.25** | 685.2 ± 121.0 | 0.64 ± 0.11 | -19.8 ± 2.4 | 88.5 ± 6 |

PS = particle size; ZP = zeta potential; %EE=entrapment efficiency


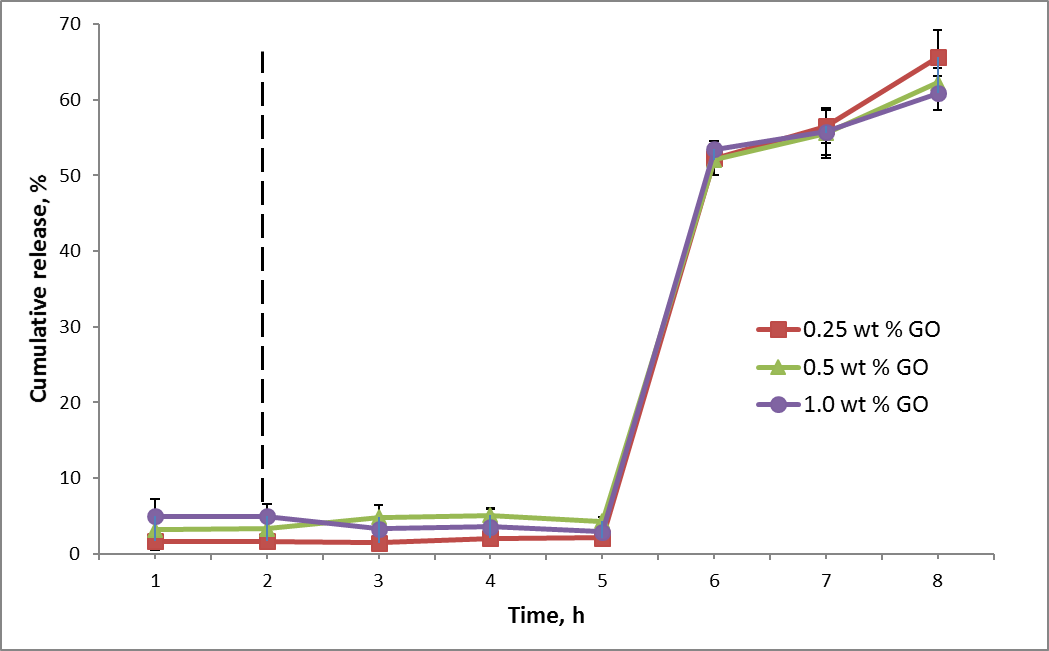


**pH 1.2 pH 6.8 pH 7.2**

**Supplementary 2** Release profile of DsiRNA from pectin-enveloped CS-GO nanocomposites of different GO amount at different pHs (1.2, 6.8, 7.2), n = 3. CS-GO nanocomposites were prepared using 0.1%w/v CS and pectin. For the first 2 h (the average gastric emptying time), the in vitro release study was conducted in simulated gastric fluid (SGF) (pH 1.2). The medium was then replaced with simulated intestinal fluid (SIF) (pH6.8) (and few drops of NaOH) and the study was continued for another 3 h. Finally, the medium was replaced with Simulated colonic fluid (SCF) (pH7.2) (and few drops of NaOH) in the presence of 0.3 mL pectinolytic enzyme and the study was extended for another 3 h. Each formulation (300 uL) was added into a dialysis tubing cellulose membrane (Sigma-Aldrich) and immersed in 50 mL of simulated fluids in a beaker. The beakers were placed in a shaker water bath (P-Selecta) (37 ± 0.2ºC) with horizontal shaking of 25 rpm. At pre-determined time intervals, 4 mL of the simulated fluid was withdrawn and the concentration of DsiRNA released was measured using UV-Vis Spectrophotometry at 260 nm. To prevent sink condition, 4 mL of fresh medium was added to the beaker to replace the withdrawn fluid. The formulation with 0.25 wt% GO and 0.1% w/v pectin had shown to provide the most optimised release of DsiRNA as it permitted low release of DsiRNA in SGF and SIF but high cumulative release in SCF.
